1 **Predation Efficiency upon Clinical Isolates: *Bdellovibrio bacteriovorus* is Prey Specific and**  
2 **Origin Dependent**

3

4 Claudia Saralegui<sup>1</sup>, Cristina Herencias<sup>2\*</sup>, Ana Halperin<sup>1</sup>, Juan de Dios-Caballero<sup>1</sup>, Blanca Pérez-  
5 Viso<sup>1</sup>, Sergio Salgado-Briegas<sup>3</sup>, Val F. Lanza<sup>1</sup>, Rafael Cantón<sup>1</sup>, Fernando Baquero<sup>1</sup>, María  
6 Auxiliadora Prieto<sup>3</sup>, Rosa del Campo<sup>1\*</sup>,

7

8 <sup>1</sup>Department of Microbiology, Hospital Universitario Ramón y Cajal, Instituto Ramón y Cajal  
9 de Investigación Sanitaria (IRYCIS), Madrid, Spain.

10 <sup>2</sup>Microbial Biotechnology Department, Centro Nacional de Biotecnología, CSIC, Madrid, Spain,  
11 C/ Darwin 3, 28049, Madrid Spain

12 <sup>3</sup>Microbial and Plant Biotechnology Department, Biological Research Center-Margarita Salas,  
13 CSIC, Ramiro de Maeztu 9, 28040 Madrid, Spain.

14 <sup>†</sup> These authors contributed equally to this work and should be considered both as first  
15 authors.

16 \*Corresponding author: Cristina Herencias and Rosa del Campo

17 Mailing address: [cherodr@gmail.com](mailto:cherodr@gmail.com) (Cristina Herencias) and [rosacampo@yahoo.com](mailto:rosacampo@yahoo.com) (Rosa  
18 del Campo).

19

## 20 ABSTRACT

21 The use of predatory bacteria as live antibiotics has been proposed for managing bacterial  
22 infections, especially for those caused by antibiotic multiresistant isolates for which there are  
23 few therapeutic options. However, the current knowledge in this field is scarce, with most of  
24 the available data based on environmental isolates, with a significant lack of human clinical  
25 samples. In this study, we evaluated the predatory spectrum of the reference strain  
26 *Bdellovibrio bacteriovorus* 109J on 13 *Serratia marcescens* (5 of which were carbapenemase  
27 producers) and 78 *Pseudomonas aeruginosa* clinical isolates from respiratory (colonizing the  
28 lungs of patients with cystic fibrosis) or bacteremic infections, differentiated by phenotype  
29 (mucoid or not), antibiotic resistance phenotype (including multidrug-resistant isolates), and  
30 genetic lineage (frequent and rare sequence types). The source of the isolates was significantly  
31 associated with predation efficiency (100% for *S. marcescens*, 67% for *P. aeruginosa* from  
32 cystic fibrosis, and 25% for *P. aeruginosa* from bacteremia). In contrast, no correlation with  
33 colonial morphotype, genetic background, or antibiotic susceptibility was found. To evaluate  
34 the influence of the predator on the predation event, we employed a more aggressive  
35 *B. bacteriovorus* mutant 109J preying upon the same 48 bacteremic *P. aeruginosa* isolates.  
36 The mutant's predation efficiency was higher than that of their wild-type counterpart (43%  
37 vs. 25%), pointing out that predation is specific to each prey-predator pair of isolates. Our  
38 results provide the most extensive study of clinical prey susceptibility published to date and  
39 show that the prey-predator interaction is influenced by the origin of the isolates rather than  
40 by their genetic background or their antibiotic susceptibility phenotype.

41

## 42 IMPORTANCE

43 The potential usefulness of predatory bacteria in controlling human pathogens, particularly  
44 those that are multiresistant to antibiotics, is enormous. Although this possibility has long  
45 been suggested, there are still no data on predation susceptibility in clinical strains, and the  
46 possible presence of autochthonous predators of the human microbiota has not been  
47 investigated. In this study, we employed a reference predator with an environmental origin to  
48 study predation phenomena in 3 well-characterized collections of human clinical isolates. Our  
49 results demonstrated that predation is a specific consequence of each prey-predator  
50 interaction, with the origin of the strains the most relevant factor. In contrast, the genetic  
51 background, morphotype, and antibiotic resistance did not appear to influence the predation  
52 phenomenon. We also highlight the involvement of a putative polyhydroxyalkanoate  
53 depolymerase protein of *B. bacteriovorus* in determining prey susceptibility. To our  
54 knowledge, this study is the largest performed with strains of clinical origin, discriminating  
55 between various genera and including strains with multiresistance to antibiotics.

56

## 57 INTRODUCTION

58 The “golden age of antibiotics” in the mid-20th century was followed by the emergence of  
59 pathogens resistant to almost all available antibiotics, leading to the current global crisis of  
60 multidrug-resistant (MDR) bacteria (1, 2). To identify successful alternative antimicrobial  
61 therapies, bacterial pathogenicity needs to be understood as a multifactorial issue in which  
62 the surrounded microbiota, which includes natural competitors and predators, is also involved  
63 (3). In nature, predatory bacteria play an important role in maintaining population sizes by  
64 linking the production and removal of biomass in microbial communities, which in turn  
65 promotes the diversity of microorganisms and contributes to the global stabilization of the

66 ecosystem (4, 5). The ecological role of predators could also be refined and exploited in the  
67 fight against clinical pathogens, given that the predators represent dynamic microorganisms  
68 that experience (as do their opponents) continuous physical, morphological, and metabolic  
69 adaptations, altering their behavior to counteract each other. This evolutionary reciprocity is  
70 the basis of coevolution, where adaptation by one player not only promotes change in its  
71 opponent, but the opponent's adaptation likewise generates selection as an evolutionary  
72 response to the first player (6). Increasing our understanding of how the microbiota  
73 community ecology is balanced will contribute to the selection of biocontrol agents that target  
74 pathogenic bacteria for which antibiotics are not an alternative due to multiresistance (7–9).  
75 The successful development of predatory bacteria as “living antimicrobial agents” and a  
76 complete understanding of the predation mechanism depend on the characterization of their  
77 phenotypical predation preferences, mainly their prey range. A predator might have a wide  
78 repertoire of susceptible prey, but predation appears to be strongly strain-specific,  
79 fundamentally based on the composition of the prey cell envelope, and influenced by  
80 environmental conditions (10–12). However, addressing the specific factor driving prey  
81 preference and susceptibility is challenging and has so far remained elusive, particularly in  
82 non-environmental bacterial collections (13, 14).

83 The most studied bacterial predators are *Bdellovibrio* and like organisms (BALOs), which are  
84 small vibrioids, rod-shaped gram-negative aerobic bacteria, recently reclassified to the class  
85 of *Oligoflexia*, which belongs to the *Proteobacteria* phylum (15). Its known prey species  
86 spectrum includes genera of *Proteobacteria* phylum as *Pseudomonas*, *Escherichia*,  
87 *Acinetobacter*, *Aeromonas*, *Burkholderia*, *Citrobacter*, *Enterobacter*, and *Klebsiella* (11, 16–  
88 18), as well as antibiotic-resistant isolates (19). Although BALOs were first isolated from soil,

89 they are ubiquitous in nature and can be found in aquatic and terrestrial environments,  
90 including hypersaline systems (20), biofilms (21), mammalian intestines (22–24), and the lungs  
91 of patients with cystic fibrosis (25). In addition to the genetic detection of BALOs, several  
92 authors have documented the *in vivo* phenomenon of predation in human microbial  
93 ecosystems (26–29).

94 Herein, we characterized the predation susceptibility and efficiency of the reference strain  
95 *B. bacteriovorus* 109J against human clinical *Serratia marcescens* and *Pseudomonas*  
96 *aeruginosa* isolates, of diverse origins, genetic backgrounds, and antibiotic-resistant  
97 phenotypes. We also explored the relevance of the predator role on predation using a more  
98 aggressive mutant, a previously described derivative of *B. bacteriovorus* 109J (30). We found  
99 a specific recognition of susceptible prey that could be related to its single deletion genotype  
100 in the *bd2637* gene, coding for a putative polyhydroxyalkanoate (PHA) depolymerase enzyme.

101

## 102 **RESULTS**

103 **Prey origin determines the predation susceptibility to *B. bacteriovorus* 109J.** The use of  
104 predatory bacteria as biocontrol agents depends on their efficiency in eradicating bacterial  
105 populations and on which bacterial species are susceptible to predation, also known as the  
106 prey range. We measured the predation susceptibility of *S. marcescens*, CF-PA and BACT-PA  
107 clinical isolates by monitoring the decrease in OD<sub>600</sub> of the predation co-cultures and by  
108 measuring the viable prey cell number.

109 All 13 *S. marcescens* isolates tested were preyed on by *B. bacteriovorus* 109J, whereas CF-PA  
110 isolates were significantly more susceptible to predation (20 out of 30, 67%) than BACT-PA (12  
111 out of 48, 25%) ( $p < 0.02$ ) (Fig 1, S1, S2, and S3). No correlation between predation and

112 *P. aeruginosa* genetic lineage was observed, with discrepancies in 6 of the 12 STs grouping  
113 more than one isolate [ST175 (1/3), ST253 (1/3), ST274 (1/2), ST532 (1/2), ST646 (2/3), and  
114 ST1017 (1/2)] (Table S1). There was also no correlation with the mucoid (4/7) or non-mucoid  
115 phenotype of CF isolates (16/23) (Fig S4) or with the antibiotic susceptibility phenotype (Fig 2  
116 and Table S2).

117 There were significant differences regarding quantitative predation (as measured by the  
118 differences in median PR) among the predation-susceptible isolates from each collection  
119 (Table S1). The median PR was 2.22 and 3.91 for *S. marcescens* and CF-PA (Mann-Whitney test  
120  $p = 0.02$ ), respectively, and 1.34 for BACT-PA (Mann-Whitney test  $p < 0.03$ ). The analysis of the  
121 predation kinetics of the curves, MKR and area under the curve (AUC) did not correlate  
122 significantly with the predation rate of each isolate (Fig S5, Table S1, and Table S3).

123 **Influence of the predator's predation capacity.** The prey or predator determinants  
124 responsible for predation specificity have not yet been elucidated. However, the hydrolytic  
125 arsenal of *B. bacteriovorus* plays a crucial role in predation efficiency, given that it determines  
126 the success of their lifecycle (30, 41). Characterization of each predator's specific prey  
127 spectrum is a requirement for the clinical use of predators as living antimicrobial agent.  
128 Studies have reported that different BALO lineages and predators isolated from different  
129 niches have different prey spectra (42, 43).

130 Interestingly, a more aggressive *B. bacteriovorus* 109J derivative has been designed and it  
131 increased by threefold the killing efficiency of the wild type preying upon *E. coli* bacterial  
132 populations (30). This strain was constructed by a single deletion of the gene bd2637 (coding  
133 for a PHA depolymerase) and WGS revealed that no significant chromosomal mutations were  
134 accumulated during the gene deletion process (Table S4).

135 We compared the predation capacity and specificity between the wild type *Bdellovibrio* and  
136 this single-gene mutant strain among the 48 BACT-PA isolates, which were the less susceptible  
137 prey collection. As expected from previous studies (30), the mutant Bd2637 strain had a higher  
138 predation frequency than the wild strain (21/48, 43.8% vs. 12/48, 25.0%); however, the  
139 differences between the PR values did not reach statistical significance (1.8 vs. 1.3, Mann-  
140 Whitney test  $p = 0.6$ ) (Table S1, Fig 1D and S6). Interestingly, the repertoire of susceptible prey  
141 was completely different: 16 out of the 48 (33.3%) BACT-PA isolates were resistant to both  
142 predators, 15 (31.2%) were susceptible only to the mutant, 7 (14.6%) were susceptible only to  
143 the wild-type strain, and 6 (12.5%) were preyed on by both predators (Fig 3). The observed  
144 discrepancies were consistently observed in the replicates of each experiment and were not  
145 associated with any particular prey characteristic. Among the common susceptible preys (e.g.,  
146 BACT1, BACT46, and BACT195), the effectiveness of each predator was strain specific. Again,  
147 the antibiotic resistance profile and the analysis of the kinetics parameters of the predation  
148 curves showed no correlation with predation susceptibility or PR (Fig 2D and S5). Thus, only  
149 the deletion of the catalytic activity derived from the *bd2637* gene and the associated effects  
150 were responsible for the changes in prey susceptibility.

## 151 **DISCUSSION**

152 The use of BALOs as biological control agents in environmental and medical microbiological  
153 settings (22, 44) has been suggested based on their lack of interaction with human cells (45).  
154 As occurs with antibiotics, testing the individual *in vitro* susceptibility for prey and predator  
155 pairs of strains is a requirement, mainly when predation could be substantially affected by  
156 environmental or biological conditions, as we postulate herein. Predators have been studied  
157 primarily within a free environmental context, given that the knowledge on predation

158 susceptibility of clinical isolates is much more limited. Although human pathogens are highly  
159 diverse, we focused our research on *Pseudomonas* and *Serratia* genera due to their ubiquity  
160 in nature, their high frequency in human diseases being also carrying antibiotic resistance  
161 genes, and the availability of previously well-characterized collections including both frequent  
162 and infrequent lineages. However, the qualitative discrepancies between isolates grouped in  
163 the same ST but from different sources, indicated that the previous adaptation to these  
164 environments influences the predation process.

165 A single bacterial species (or ST) can be found in different habitats, as environmental and  
166 nosocomial niches (human microbiota of patients, built environments). Nevertheless,  
167 population genetic studies have revealed differing genetic evolutionary processes, in  
168 particular for those lineages highly adapted to hospital conditions, which are also known as  
169 high-risk clones, as is the case for *P. aeruginosa*, which colonizes the airways of CF-patients  
170 and are close to strains of environmental origin, as we have previously shown (46). A notable  
171 result of our study is the higher susceptibility of CF isolates to predation, without correlation  
172 with the morphological growth (muroid vs. non-muroid), genotype (absence of correlation  
173 with STs), or antibiotic susceptibility patterns. The presence of highly specialized predators in  
174 human microbiota cannot be ruled out, given that all available data have focused on  
175 environmental predators. Our microbial ecosystems, however, probably have the same rules  
176 of population control based on predation. Predators with a human origin could be more  
177 suitable for limiting well-adapted human pathogens (25).

178 In a complex and diverse ecosystem, preference for particular prey would be a dynamic  
179 feature (47). Although experiments are often conducted using individual lineages, the use of  
180 mixed populations should be a future goal to validate prey specificity in a community and the



181 consequences on microbial population structure. This work indicates that quantitative  
182 predation, determined as relative predation rates (PR) between members of a community,  
183 could be critical to understand the dynamics of bacterial ensembles composed by different  
184 preys and predators. All *S. marcescens* isolates were susceptible to predation, as previously  
185 reported (27), and the PR was significantly higher compared with *P. aeruginosa* isolates. This  
186 finding is in line with a previous report showing a limited ability of some *B. bacteriovorus* to  
187 prey on *P. aeruginosa* (48).

188 The contribution of the predators' genetic background is a pending issue. Thus far, only 8  
189 *B. bacteriovorus* genomes have been entered into public databases, all of them from an  
190 environmental origin. To elucidate that, we used the mutant Bd2637 that was found to be a  
191 more aggressive phenotype than the wild-type *B. bacteriovorus* 109J (30). The genotype of  
192 the Bd2637 strain corresponds to a single deletion of the gen bd2637, which encodes a  
193 putative PHA depolymerase responsible for the degradation of biopolymers. The analysis of  
194 the amino acid sequence of this enzyme revealed that, apart from the characteristic esterase  
195 catalytic domain type 2 (49), the N-terminal sequence possesses a peptidase-like domain (50).  
196 This structure would provide a Bd2637 enzyme, which might act as a promiscuous enzyme  
197 with the proper catalytic architecture to act on extracellular specific components of the prey  
198 (outer membrane components, extracellular matrix, or capsid), thereby promoting specific  
199 predation. This specificity could explain why the predator is unable to complete or even begin  
200 the predatory cycle and could help identify predation resistance factors. Thus, the selection  
201 of the appropriate predator for specific prey, which needs a larger and more in-depth study  
202 on predation, would be overcome with the rational use of broad prey spectrum predators. It  
203 is worth noting that the prey range does not depend only on the prey susceptibility but also

204 on the predator specificity, which highlights the importance of predator-prey interaction and  
205 co-evolution to overcome predation and resistance, respectively (51).

206 In summary, we conclude that the phenomenon of predation is defined by the particularities  
207 of both prey and predator isolates and is conditioned by environmental factors. There is a  
208 possible source dependence, and the presumption of predation cannot be inferred from  
209 different isolates of the same species, even within the same genetic lineage. To define an  
210 ecological alternative to antibiotics, the possible existence of predators within the human  
211 microbiota should be explored.

212

## 213 **MATERIALS AND METHODS**

214 **Strains and growth conditions.** The *B. bacteriovorus* 109J reference strain and its PHA-  
215 depolymerase mutant *B. bacteriovorus* 109J-bd2637 were used as predators in our  
216 experimental system (30). Prey (n=91) were selected from previously well-characterized  
217 collections of *S. marcescens* colonizing or infecting patients (neonates and adults) admitted to  
218 intensive care units (n=13) (31, 32). *P. aeruginosa* isolated from the airways of patients with  
219 cystic fibrosis (hereafter CF-PA, n=30) (33), and invasive isolates causing bacteremic infections  
220 (hereafter BACT-PA, n=48) (34). The inclusion criterion for the *S. marcescens* isolates, 5 of  
221 which were carbapenemase producers, was the availability of their whole-genome sequence.  
222 CF-PA and BACT-PA isolates were selected based on their genetic background discriminated  
223 by sequence type (ST), including both frequent and rare STs, as well as by their antibiotic  
224 susceptibility, including MDR isolates. Colony morphology was only considered in CF-PA  
225 isolates as mucoid (n=7) and non-mucoid isolates (n=23). Relevant data on all isolates is shown  
226 in Tables S1 and S2.

227 Predators were routinely grown (as described previously) by co-cultivation with *Pseudomonas*  
228 *putida* KT2440 in Difco nutrient broth (DNB) (0.8 g/l nutrient broth at pH 7.4) or HEPES buffer  
229 (25 mM at pH 7.8) supplemented with 2 mM CaCl<sub>2</sub>·2H<sub>2</sub>O and 3 mM MgCl<sub>2</sub>·3H<sub>2</sub>O and were  
230 further purified by filtering twice through a 0.45-µm filter. The prey strains were cultivated on  
231 Luria Broth (LB) for 16 h at 37 °C and were further diluted in HEPES buffer to an optical density  
232 at 600 nm of 1 (OD<sub>600</sub> 1) for the subsequent experiments.

233 **Genetic background of prey and predators.** Whole-genome sequencing (WGS) of both  
234 predator strains was performed on the Illumina HiSeq 4000 platform following the  
235 specification of Microbes NG (<https://microbesng.com/>). WGS data is available at BioProject  
236 ID: PRJNA723206 (<https://www.ncbi.nlm.nih.gov/sra/PRJNA723206>) and Genbank accession  
237 numbers: SRX10641169 and SRX10641170 for *B. bacteriovorus* 109J and the Bd2637 mutant,  
238 respectively. Genome comparisons were performed using *minimap2* (35) and *paftools* to align  
239 and variant calling respectively. Variant calling parameters were set to 500 bp minimum length  
240 to compute coverage and variant. Mutations were manually inspected with Artemis (36).

241 A tree showing the genetic relationship of 457 genomes of *S. marcescens* was constructed by  
242 combining a previously published tree (31) and 5 additional genomes of the carbapenemase-  
243 producing isolates (32). The analysis was performed by the cano-wgMLST\_BacCompare web-  
244 based tool (37), and the final tree was edited using the iTOL v4.4.2 web-based tool (38). STs  
245 of the *P. aeruginosa* isolates were depicted as a minimum-spanning tree by the PHYLOViZ tool  
246 using the 7 concatenated sequences of all isolates available in May 2021 in  
247 <https://pubmlst.org/organisms/pseudomonas-aeruginosa>.

248 **Predation experiments.** The predation experiments included measuring predator and prey  
249 viability and monitoring cell density (OD<sub>600</sub>) for 24 h. Predation co-cultures were prepared in

250 HEPES buffer and inoculated with a *Bdellovibrio* inoculum of  $10^9$  plaque-forming units/ml  
251 (PFU/ml) and a prey inoculum adjusted to an  $OD_{600}$  of 0.3. Predator and prey strain viabilities  
252 were calculated from the co-culture containing both strains. *B. bacteriovorus* strain viabilities  
253 (measured in PFU/ml) were calculated by performing serial dilutions from  $10^{-1}$  to  $10^{-7}$  in HEPES  
254 buffer and developing on the lawn of prey bacteria after 48–72 h of incubation at 30 °C using  
255 the double-layer method (39, 40). Briefly, 0.1 ml of the appropriate dilution was mixed with  
256 an additional 0.5 ml prey cell suspension of *P. putida* KT2440 pre-grown in LB and prepared in  
257 HEPES Buffer at pH 7.8 at  $OD_{600}$  10, vortexed and plated on DNB solid medium. To calculate  
258 prey viable cell counts (clinical isolates), 10  $\mu$ l of each dilution was plated on LB solid medium  
259 and colony-forming units (CFU/ml) were counted after 24 h of incubation at 37 °C.

260 Prey-predator co-cultures were performed on 96-microwell plates at a final volume of 200  $\mu$ l  
261 and incubated for 24 h at 30 °C with orbital shaking in a Synergy HTX (BioTek). Two conditions  
262 were tested for each prey: the growth control well without the predator and the predation  
263 well with the mixture of prey and predator. The prey's dynamic survival was monitored by  
264 measuring  $OD_{600}$  every 10 min, counting the viable cells at the end of the experiment by  
265 seeding on LB agar plates. Each prey was tested in at least 2–3 independent biological  
266 replicates, and the results corresponded to the mean values of all experiments.

267 The predation rate (PR) was calculated as the ratio of viable cells at the control well to the  
268 predation well at the end of the experiment expressed in log<sub>10</sub> values. Positive predation is  
269 considered when this rate was >0.5. The predation kinetics encompassed the area under the  
270 curve (AUC) and the maximum killing rate (MKR). The AUC parameter was obtained using the  
271 'auc' function from the 'flux' R package. The MKR value corresponds to the slope of the  
272 predation curve: the more negative the MKR, the more efficient the predation. The MKR was

273 calculated as the opposite value of  $\mu_{\max}$  (maximum growth rate in typical growth curves),  
274 which was obtained from the 'growthrates' R package. Data are represented using an R  
275 custom script and the 'ggplot2' package.

276 **UMAP clustering.** UMAP was used to visualize the clustering distribution of the antibiotic  
277 resistance profile and predation susceptibility. The statistical analysis was performed in R  
278 version 3.5.0, and plotting was performed using ggplot version 2.2.1.

279 **Statistical analysis.** Data sets were analyzed using Prism 6 software (GraphPad Software Inc.)  
280 and RStudio software v.1.2.5001. An unpaired t-test followed by Welch's correction was  
281 performed to compare the prey's PR. A non-parametric paired Wilcoxon test was performed  
282 to compare the MKR values in control versus predation wells, and the Kruskal-Wallis test was  
283 performed to compare PR values between collections, after assuming non-normality with the  
284 Shapiro-Wilk normality test. Lastly, the differences in predation frequency between the CF  
285 and BACT-PA collections were explored using the chi-squared test.

286

## 287 **ACKNOWLEDGMENTS**

288 We appreciate the technical support of Natalia Huertas. CH is supported by Comunidad  
289 Autónoma de Madrid (PEJD-2018- POST/BMD-8016). CS is granted by "Fundación Mutua  
290 Madrileña" achieved in 2017 call by RDC (AP165902017). SSB is a recipient of a predoctoral  
291 FPU grant (FPU17/03978) from the Spanish Ministry of Universities. This work was supported  
292 by the Instituto de Salud Carlos III, PI17/00115 and PI20/00164 to RdC, REIPI  
293 (RD16/0016/0011) actions, co-financed by the European Development Regional Fund "A way  
294 to achieve Europe" (ERDF), and Vertex Pharmaceuticals.

295

296 **COMPETING INTERESTS**

297 RdC was the recipient of a Vertex Pharmaceuticals grant. The other authors declare no conflict  
298 of interest.

299

300 **REFERENCES**

- 301 1. Cavallo FM, Jordana L, Friedrich AW, Glasner C, van Dijk JM. 2021. *Bdellovibrio*  
302 *bacteriovorus*: a potential ‘living antibiotic’ to control bacterial pathogens. Crit Rev  
303 Microbiol 0:1–17.
- 304 2. Baquero F. 2021. Threats of antibiotic resistance: an obliged reappraisal. Int Microbiol  
305 1.
- 306 3. Celis AI, Relman DA. 2020. Competitors versus Collaborators: Micronutrient processing  
307 by pathogenic and commensal human-associated gut bacteria. Mol Cell 78:570–576.
- 308 4. Fuhrman JA, Caron DA. 2016. Heterotrophic planktonic microbes: virus, bacteria,  
309 archaea, and protozoa <https://doi.org/10.1128/9781555818821.ch4.2.2>.
- 310 5. Thompson JN. 1999. The evolution of species interactions. Sci (washingt D C) 284:2116–  
311 2118.
- 312 6. Gallet R, Tully T, Evans MEK. 2009. Ecological conditions affect evolutionary trajectory  
313 in a predator-prey system. Evolution (N Y) 63:641–651.
- 314 7. Madhav M, Baker D, Morgan JA., Asgari S, James P. 2020. Wolbachia: A tool for livestock  
315 ectoparasite control. Vet Parasitol 288:109297.
- 316 8. Legein M, Smets W, Vandenheuvel D, Eilers T, Muysshondt B, Prinsen E, Samson R,  
317 Lebeer S. 2020. Modes of action of microbial biocontrol in the phyllosphere. Front  
318 Microbiol 11.

- 319 9. Shen Y, Loessner MJ. 2021. Beyond antibacterials – exploring bacteriophages as  
320 antivirulence agents. *Curr Opin Biotechnol* 68:166–173.
- 321 10. Lambert C, Lerner TR, Bui NK, Somers H, Aizawa S-I, Liddell S, Clark A, Vollmer W,  
322 Lovering AL, Sockett RE. 2016. Interrupting peptidoglycan deacetylation during  
323 *Bdellovibrio* predator-prey interaction prevents ultimate destruction of prey wall,  
324 liberating bacterial-ghosts. *Sci Rep* 6:26010.
- 325 11. Jurkevitch E, Davidov Y. 2006. Phylogenetic diversity and evolution of predatory  
326 prokaryotes ACS Division of Fuel Chemistry, Preprints.
- 327 12. Pernthaler J. 2005. Predation on prokaryotes in the water column and its ecological  
328 implications. *Nat Rev Microbiol* 3:537–546.
- 329 13. Li N, Wang K, Williams HN, Sun J, Ding C, Leng X, Dong K. 2017. Analysis of gene gain  
330 and loss in the evolution of predatory bacteria. *Gene* 598:63–70.
- 331 14. Duncan MC, Gillette RK, Maglasang MA, Corn EA, Tai AK, Lazinski DW, Shanks RMQ,  
332 Kadouri DE, Camilli A. 2019. High-Throughput analysis of gene function in the bacterial  
333 predator *Bdellovibrio bacteriovorus*. *MBio* 10.
- 334 15. Waite DW, Chuvochina M, Pelikan C, Parks DH, Yilmaz P, Wagner M, Loy A, Naganuma  
335 T, Nakai R, Whitman WB, Hahn MW, Kuever J, Hugenholtz P. 2020. Proposal to reclassify  
336 the proteobacterial classes Deltaproteobacteria and Oligoflexia, and the phylum  
337 Thermodesulfobacteria into four phyla reflecting major functional capabilities. *Int J Syst*  
338 *Evol Microbiol* 70:5972–6016.
- 339 16. Chanyi RM, Ward C, Pechey A, Koval SF. 2013. To invade or not to invade: two  
340 approaches to a prokaryotic predatory life cycle. *NCR Res Press* 59:273–279.
- 341 17. Russo R, Chae R, Mukherjee S, Singleton E, Occi J, Kadouri D, Connell N. 2015.

- 342 Susceptibility of select agents to predation by predatory bacteria. *Microorganisms*  
343 3:903–912.
- 344 18. Baker M, Negus D, Raghunathan D, Radford P, Moore C, Clark G, Diggle M, Tyson J,  
345 Twycross J, Sockett RE. 2017. Measuring and modelling the response of *Klebsiella*  
346 *pneumoniae* KPC prey to *Bdellovibrio bacteriovorus* predation, in human serum and  
347 defined buffer. *Sci Rep* 7:8329.
- 348 19. Dharani S, Kim DH, Shanks RM, Doi Y, Kadouri DE. 2018. Susceptibility of colistin-  
349 resistant pathogens to predatory bacteria. *Res Microbiol* 169:52–55.
- 350 20. Piñeiro SA, Williams HN, Stine OC. 2008. Phylogenetic relationships amongst the  
351 saltwater members of the genus *Bacteriovorax* using *rpoB* sequences and  
352 reclassification of *Bacteriovorax stolpii* as *Bacteriolyticum stolpii* gen. nov., comb. nov.  
353 *Int J Syst Evol Microbiol* 58:1203–1209.
- 354 21. Kadouri D, O’Toole GA. 2005. Susceptibility of biofilms to *Bdellovibrio bacteriovorus*  
355 attack. *Appl Environ Microbiol* 71:4044–4051.
- 356 22. Hopley L, Lerner TR, Williams LE, Lambert C, Till R, Milner DS, Basford SM, Capeness MJ,  
357 Fenton AK, Atterbury RJ, Harris MATS, Sockett RE. 2012. Genome analysis of a  
358 simultaneously predatory and prey-independent, novel *Bdellovibrio bacteriovorus* from  
359 the River Tiber, supports in silico predictions of both ancient and recent lateral gene  
360 transfer from diverse bacteria. *BMC Genomics* 13:670.
- 361 23. Schwudke D, STRAUCH E, KRUEGER M, APPEL B. 2001. Taxonomic studies of predatory  
362 *Bdellovibrios* Based on 16S rRNA Analysis, Ribotyping and the hit Locus and  
363 Characterization of Isolates from the Gut of Animals. *Syst Appl Microbiol* 24:385–394.
- 364 24. Iebba V, Santangelo F, Totino V, Nicoletti M, Gagliardi A, De Biase RV, Cucchiara S,



- 365 Nencioni L, Conte MP, Schippa S. 2013. Higher prevalence and abundance of  
366 *Bdellovibrio bacteriovorus* in the human gut of healthy subjects. PLoS One 8:e61608.
- 367 25. Caballero JDD, Vida R, Cobo M, Máiz L, Suárez L, Galeano J, Baquero F, Canton R, Del  
368 Campo R. 2017. Individual patterns of complexity in including predator bacteria , over  
369 a 1-Year Period 8:e00959-17.
- 370 26. Shatzkes K, Singleton E, Tang C, Zuena M, Shukla S, Gupta S, Dharani S, Onyile O,  
371 Rinaggio J, Connell ND, Kadouri DE. 2016. Predatory bacteria attenuate *Klebsiella*  
372 *pneumoniae* burden in rat lungs. MBio 7:1–9.
- 373 27. Shanks RMQ, Davra VR, Romanowski EG, Brothers KM, Stella N a, Godbole D, Kadouri  
374 DE. 2013. An Eye to a Kill: Using predatory bacteria to control Gram-negative pathogens  
375 associated with ocular infections. PLoS One 8:e66723.
- 376 28. Romanowski EG, Stella NA, Brothers KM, Yates KA, Funderburgh ML, Funderburgh JL,  
377 Gupta S, Dharani S, Kadouri DE, Shanks RMQ. 2016. Predatory bacteria are nontoxic to  
378 the rabbit ocular surface. Sci Rep 6:30987.
- 379 29. Silva PHF, Oliveira LFF, Cardoso RS, Ricoldi MST, Figueiredo LC, Salvador SL, Palioto DB,  
380 Furlaneto FAC, Messoria MR. 2019. The impact of predatory bacteria on experimental  
381 periodontitis. J Periodontol <https://doi.org/10.1002/JPER.18-0485>.
- 382 30. Martínez V, Herencias C, Jurkevitch E, Prieto MA. 2016. Engineering a predatory  
383 bacterium as a proficient killer agent for intracellular bio-products recovery: The case  
384 of the polyhydroxyalkanoates. Sci Rep 6:24381.
- 385 31. Saralegui C, Ponce-Alonso M, Pérez-Viso B, Moles Alegre L, Escribano E, Lázaro-Perona  
386 F, Lanza VF, de Pipaón MS, Rodríguez JM, Baquero F, del Campo R. 2020. Genomics of  
387 *Serratia marcescens* isolates causing outbreaks in the same pediatric unit 47 years

- 388           apart: position in an updated phylogeny of the species. *Front Microbiol* 11:1–15.
- 389   32.   Pérez-Viso B, Hernández-García M, Ponce-Alonso M, Morosini MI, Ruiz-Garbajosa P, del  
390       Campo R, Cantón R. 2020. Characterization of carbapenemase-producing *Serratia*  
391       *marcescens* and whole-genome sequencing for plasmid typing in a hospital in Madrid,  
392       Spain (2016–18). *J Antimicrob Chemother* 1–7.
- 393   33.   López-Causapé C, de Dios-Caballero J, Cobo M, Escribano A, Asensio Ó, Oliver A, Del  
394       Campo R, Cantón R, Solé A, Cortell I, Asensio O, García G, Martínez MT, Cols M, Salcedo  
395       A, Vázquez C, Baranda F, Girón R, Quintana E, Delgado I, de Miguel MÁ, García M, Oliva  
396       C, Prados MC, Barrio MI, Pastor MD, Oliveira C, de Gracia J, Álvarez A, Escribano A,  
397       Castillo S, Figuerola J, Togores B, Oliver A, López C, de Dios Caballero J, Tato M, Máiz L,  
398       Suárez L, Cantón R. 2017. Antibiotic resistance and population structure of cystic  
399       fibrosis *Pseudomonas aeruginosa* isolates from a Spanish multi-centre study. *Int J*  
400       *Antimicrob Agents* 50:334–341.
- 401   34.   García-Castillo M, Del Campo R, Morosini MI, Riera E, Cabot G, Willems R, Van Mansfeld  
402       R, Oliver A, Cantón R. 2011. Wide dispersion of ST175 clone despite high genetic  
403       diversity of carbapenem-nonsusceptible *Pseudomonas aeruginosa* clinical strains in 16  
404       Spanish hospitals. *J Clin Microbiol* 49:2905–2910.
- 405   35.   Li H. 2018. Minimap2: pairwise alignment for nucleotide sequences. *Bioinformatics*  
406       34:3094–3100.
- 407   36.   Rutherford K, Parkhill J, Crook J, Horsnell T, Rice P, Rajandream M-A, Barrell B. 2000.  
408       Artemis: sequence visualization and annotation. *Bioinformatics* 16:944–945.
- 409   37.   Liu Y-Y, Lin J-W, Chen C-C. 2019. cano-wgMLST\_BacCompare: A bacterial genome  
410       analysis platform for epidemiological investigation and comparative genomic analysis.

- 411 Front Microbiol 10:1687.
- 412 38. Letunic I, Bork P. 2019. Interactive Tree Of Life (iTOL) v4: recent updates and new  
413 developments. Nucleic Acids Res 47:W256–W259.
- 414 39. Herencias C, Prieto MA, Martínez V. 2017. Determination of the predatory capability of  
415 *Bdellovibrio bacteriovorus* HD100. Bio-protocol 7:2–10.
- 416 40. Lambert C, Socket RE. 2008. Laboratory maintenance of *Bdellovibrio*. Curr Protoc  
417 Microbiol 1–13.
- 418 41. Rendulic S, Jagtap P, Rosinus A, Eppinger M, Baar C, Lanz C, Keller H, Lambert C, Evans  
419 KJ, Goesmann A, Meyer F, Sockett RE, Schuster SC. 2004. A predator unmasked: life  
420 cycle of *Bdellovibrio bacteriovorus* from a genomic perspective. Science 303:689–92.
- 421 42. Jurkevitch E, Minz D, Ramati B, Barel G. 2000. Prey range characterization, ribotyping,  
422 and diversity of soil and rhizosphere *Bdellovibrio* spp. isolated on phytopathogenic  
423 bacteria. Appl Environ Microbiol 66:2365–2371.
- 424 43. STARR MPASRJ. 1971. The *Bdellovibrios*. Annu Rev Microbiol 25:649–678.
- 425 44. Westergaard JM, Kramer TT. 1977. *Bdellovibrio* and the intestinal flora of vertebrates.  
426 Appl Environ Microbiol 34:506–511.
- 427 45. Bonfiglio G, Neroni B, Radocchia G, Marazzato M, Pantanella F, Schippa S. 2020. Insight  
428 into the Possible Use of the Predator *Bdellovibrio bacteriovorus* as a Probiotic. Nutrients  
429 12.
- 430 46. Fernández-Olmos A, García-Castillo M, María Alba J, Morosini MI, Lamas A, Romero B,  
431 Galán JC, Del Campo R, Cantón R. 2013. Population structure and Antimicrobial  
432 susceptibility of both nonpersistent and persistent *Pseudomonas aeruginosa* isolates  
433 recovered from cystic fibrosis patients. J Clin Microbiol 51:2761–2765.

- 434 47. Rogosky AM, Moak PL, Emmert E a B. 2006. Differential predation by *Bdellovibrio*  
435 *bacteriovorus* 109J. *Curr Microbiol* 52:81–5.
- 436 48. Markelova NY. 2010. Predacious bacteria, *Bdellovibrio* with potential for biocontrol. *Int*  
437 *J Hyg Environ Health* 213:428–431.
- 438 49. Knoll M, Hamm TM, Wagner F, Martinez V, Pleiss J. 2009. The PHA Depolymerase  
439 Engineering Database: A systematic analysis tool for the diverse family of  
440 polyhydroxyalkanoate (PHA) depolymerases. *BMC Bioinformatics* 10:89.
- 441 50. Potter SC, Luciani A, Eddy SR, Park Y, Lopez R, Finn RD. 2018. HMMER web server: 2018  
442 update. *Web Serv issue Publ online* 46.
- 443 51. Sydney N, Swain MT, So JMT, Hoiczuk E, Tucker NP, Whitworth DE. 2021. The Genetics  
444 of Prey Susceptibility to Myxobacterial Predation: A Review, Including an Investigation  
445 into *Pseudomonas aeruginosa* Mutations Affecting Predation by *Myxococcus xanthus*.  
446 *Microb Physiol* 1–10.
- 447
- 448

449

## FIGURES

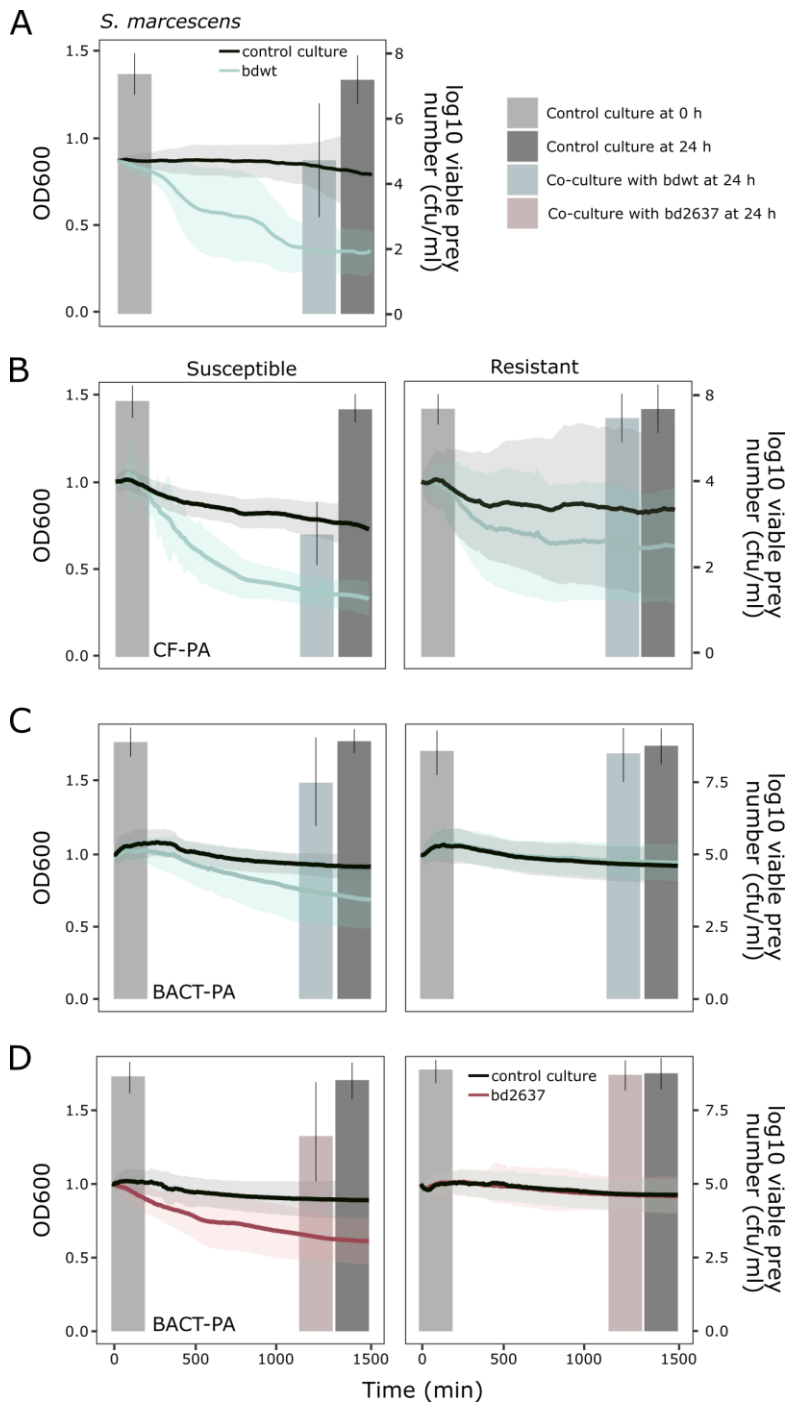

450

451 **Fig 1. Predation susceptibility of prey collections on hepes buffer.** Monitoring of OD<sub>600</sub> during

452 24 h of predation and quantification of viable prey number. A) Predation of *B. bacteriovorus*

453 109J upon *S. marcescens* collection (individual predation curves in Fig S1). B) Predation of *B.*

454 *bacteriovorus* 109J upon CF-PA collection (Individual predation curves in Fig S2), C) predation

455 of *B. bacteriovorus* 109J upon BSI-PA collection (Individual predation curves in Fig S3) and D)  
456 predation of bd2637 mutant upon BSI-PA collection (Individual predation curves in Fig S6).  
457 OD<sub>600</sub> was measured every 10 min and lines represent the mean of 3 biological replicates, and  
458 the shaded area indicates standard error of the mean. Bars represent the means of 3  
459 independent viable prey quantification and error bars represent the standard error of the  
460 mean. Left and right panels represent the average of susceptible and resistant preys,  
461 respectively, of each collection.  
462

463

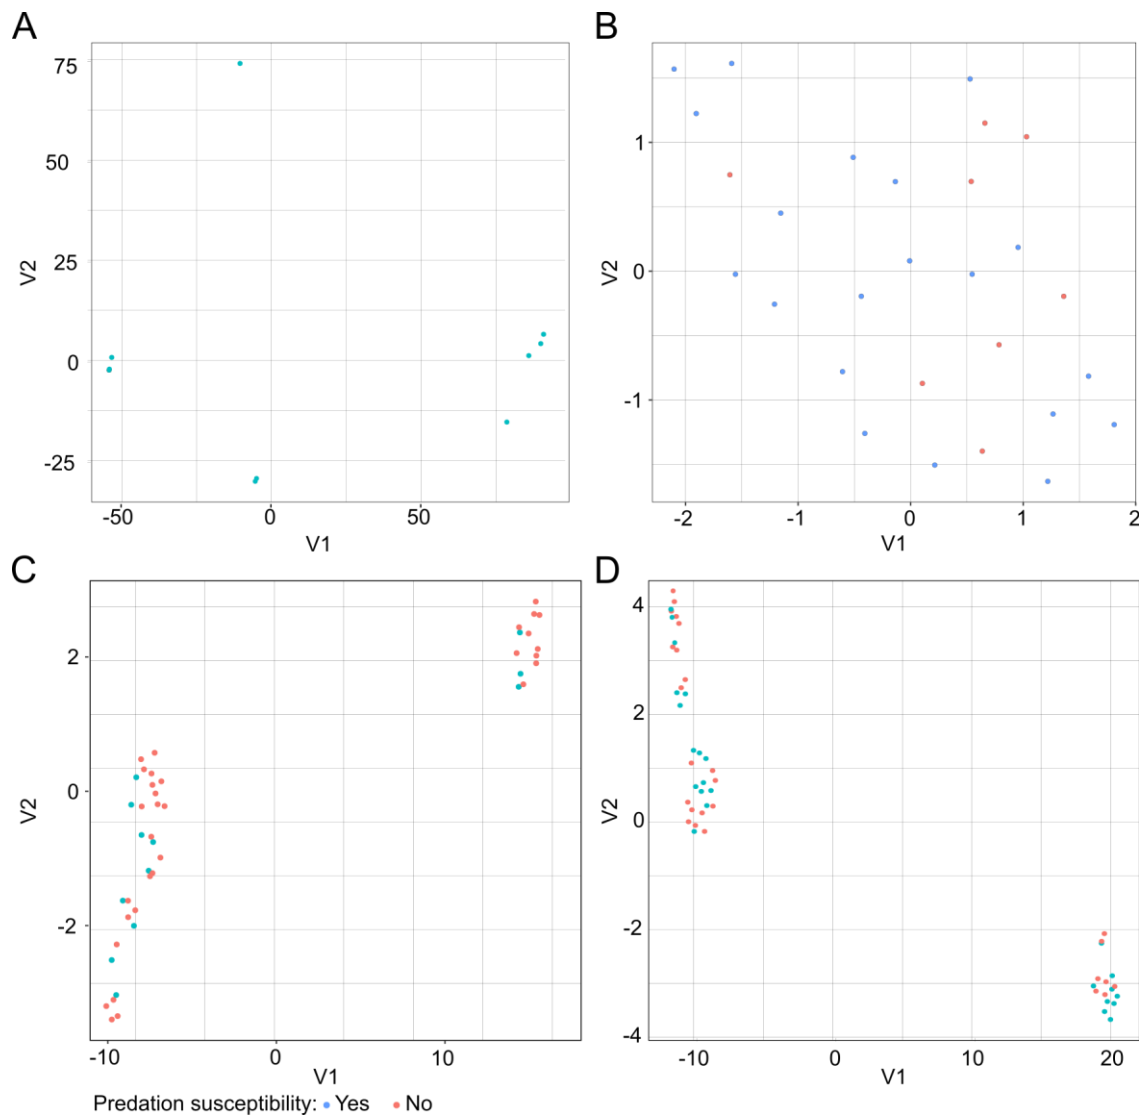

464

465 **Fig 2. UMAP visualization of the association of predation susceptibility and antibiotic**

466 **resistant profile of prey cells. A) *S. marcescens* and *B. bacteriovorus* 109J, B) CF-*P. aeruginosa***

467 **and *B. bacteriovorus* 109J, C) BACT-*P. aeruginosa* and *B. bacteriovorus* 109J; and D) BACT-**

468 ***P. aeruginosa* and Bd2637 *B. bacteriovorus* data collections.**

469

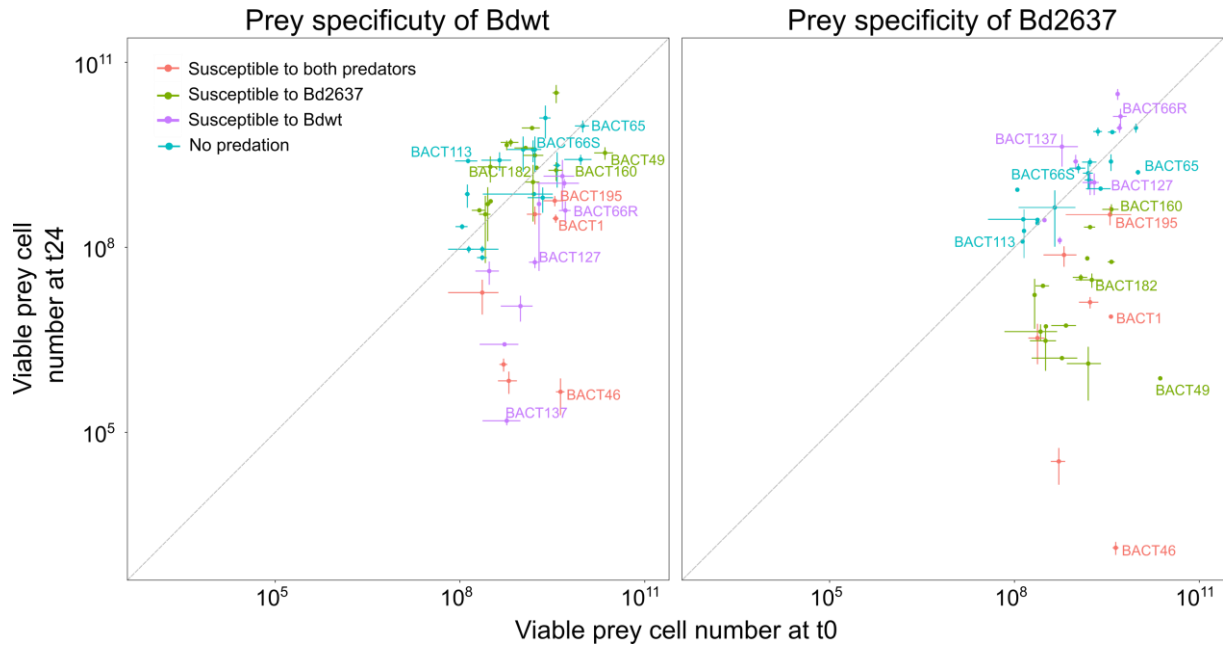

470

471 **Fig 3. Prey specificity of predators among BACT-*P. aeruginosa* collection.** Relationship  
472 between the viable prey number at the end (t24) and the beginning (t0) of the predation  
473 event. Data points below the grey line represent the susceptible preys for *B. bacteriovorus*  
474 109J and Bd2637 *B. bacteriovorus*.

475

476

477

478

479

480

481

482

483

484



485 SUPPLEMENTARY MATERIAL

486

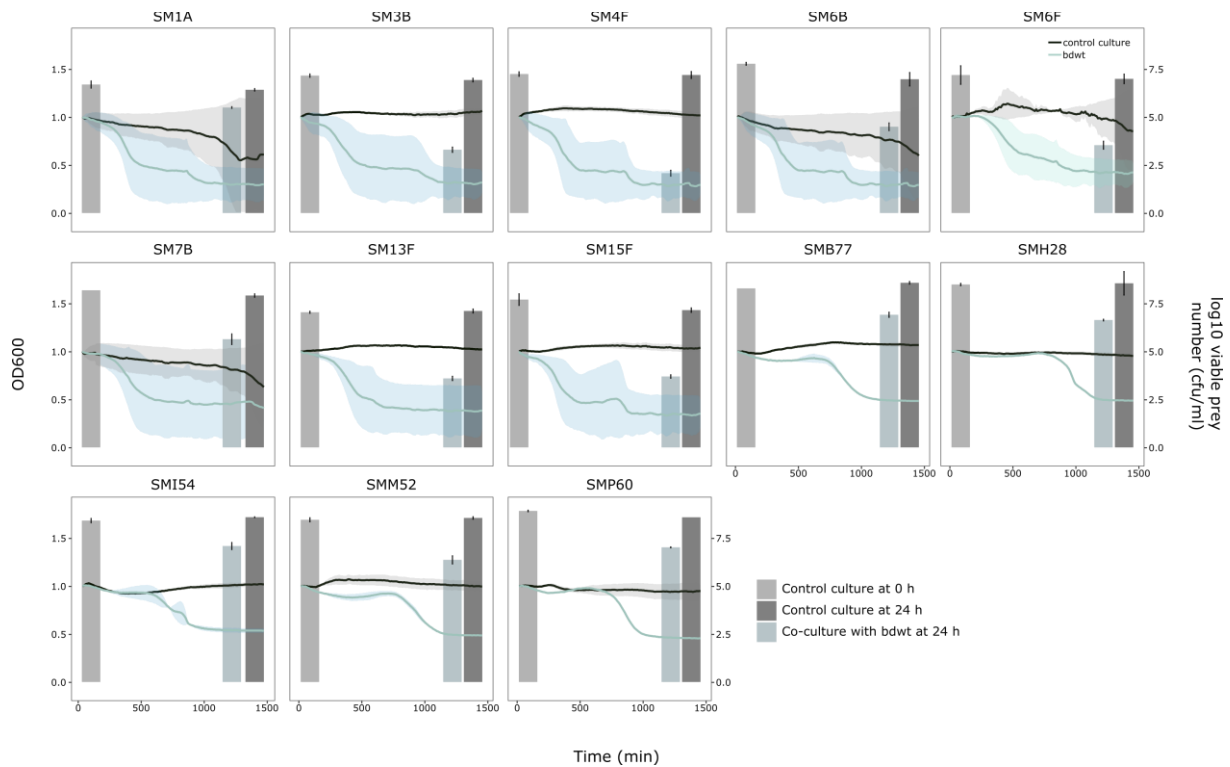

487

488 **Fig S1. Predation susceptibility of *S. marcescens* prey collection by *B. bacteriovorus* 109J.**

489 OD<sub>600</sub> was measured every 10 min and lines represent the mean of 3 biological replicates, and

490 the shaded area indicates standard error of the mean. Bars represent the means of 3

491 independent viable prey quantification and error bars represent the standard error of the

492 mean.

493

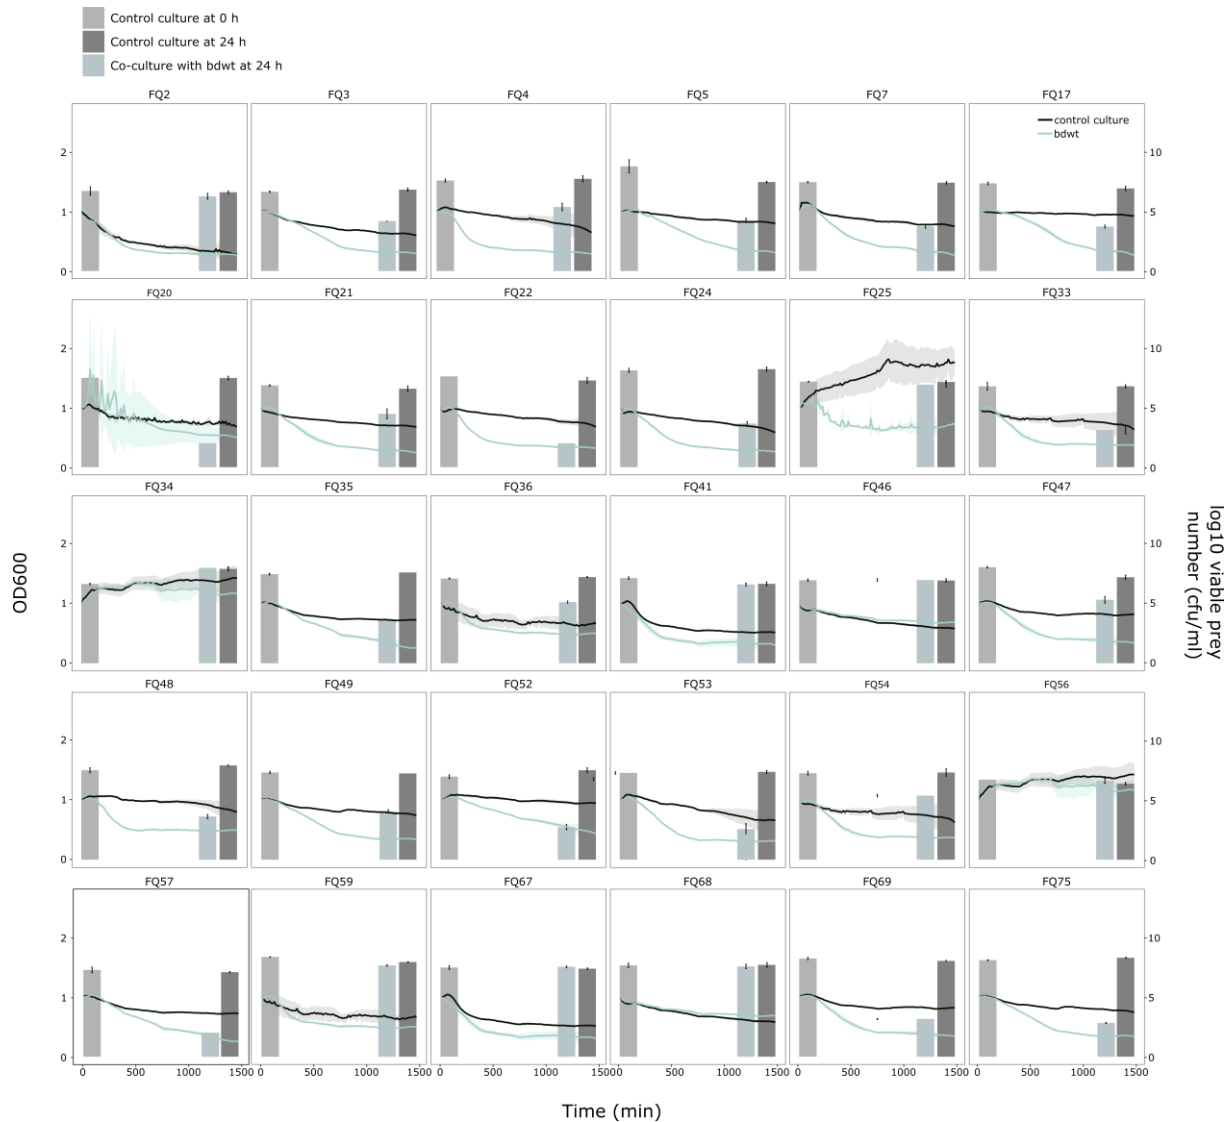

494

495 **Fig S2. Predation susceptibility of Cf-PA prey collection by *B. bacteriovorus* 109J.** OD<sub>600</sub> was  
496 measured every 10 min and lines represent the mean of 3 biological replicates, and the shaded  
497 area indicates standard error of the mean. Bars represent the means of 3 independent viable  
498 prey quantification and error bars represent the standard error of the mean.

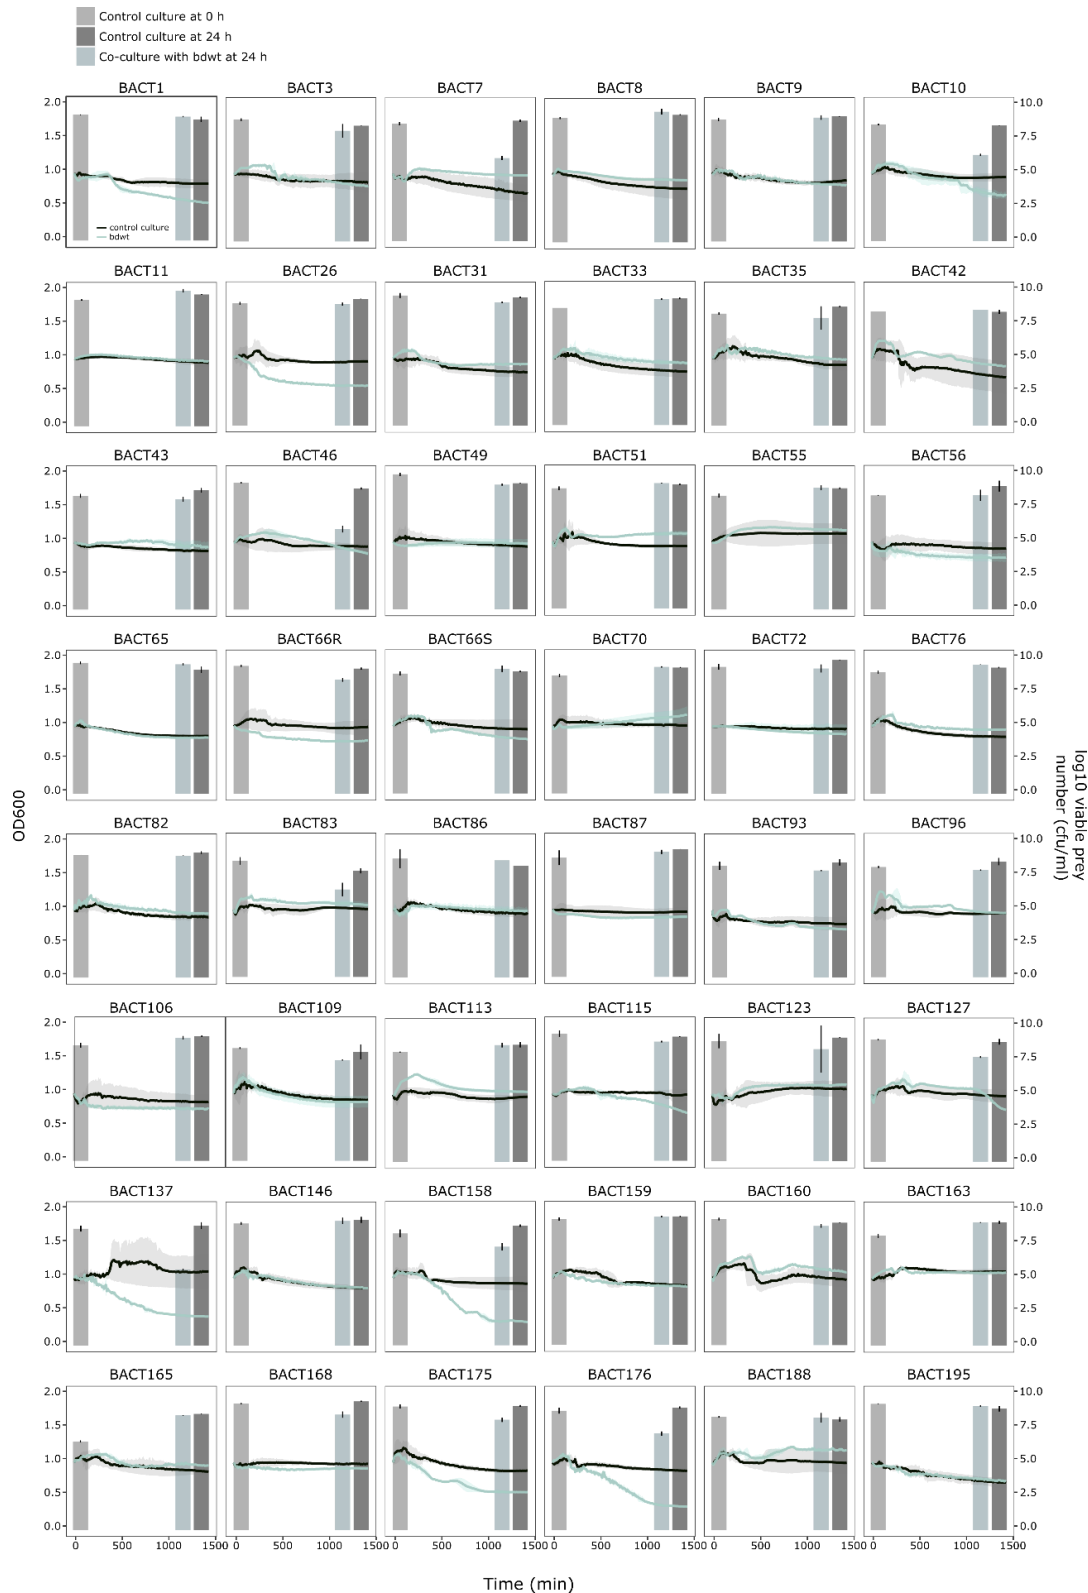

499

500 **Fig S3. Predation susceptibility of BSI-PA prey collection by *B. bacteriovorus* 109J.** OD<sub>600</sub> was  
501 measured every 10 min and lines represent the mean of 3 biological replicates, and the shaded  
502 area indicates standard error of the mean. Bars represent the means of 3 independent viable  
503 prey quantification and error bars represent the standard error of the mean.

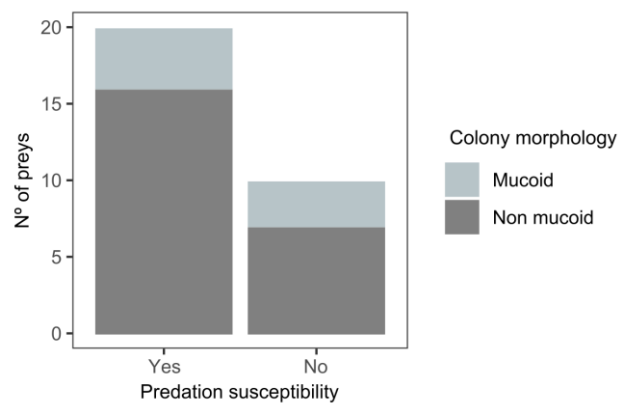

504

505 **Fig S4. Correlation of morphotypes with predation susceptibility.** Number of preys belonged  
506 to each morphotype from CF-PA collection.

507

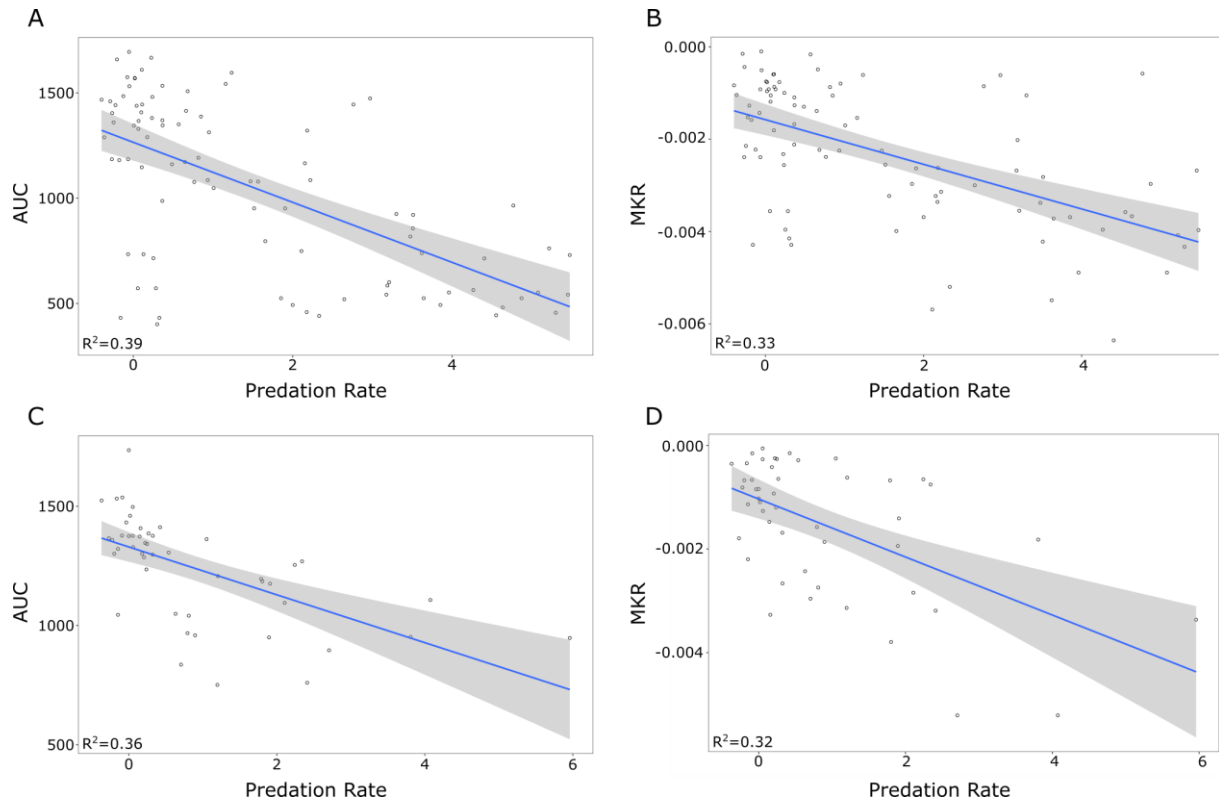

508

509 **Fig S5. Correlation between kinetic parameter and predation rate of *B. bacteriovorus* 109J**  
510 **(A and B) and the mutant strain bd2637 (C and D).** AUC: Area under de curve; MKR: Maximun  
511 killing rate.

512

513

514

515

516

517

518

519

520

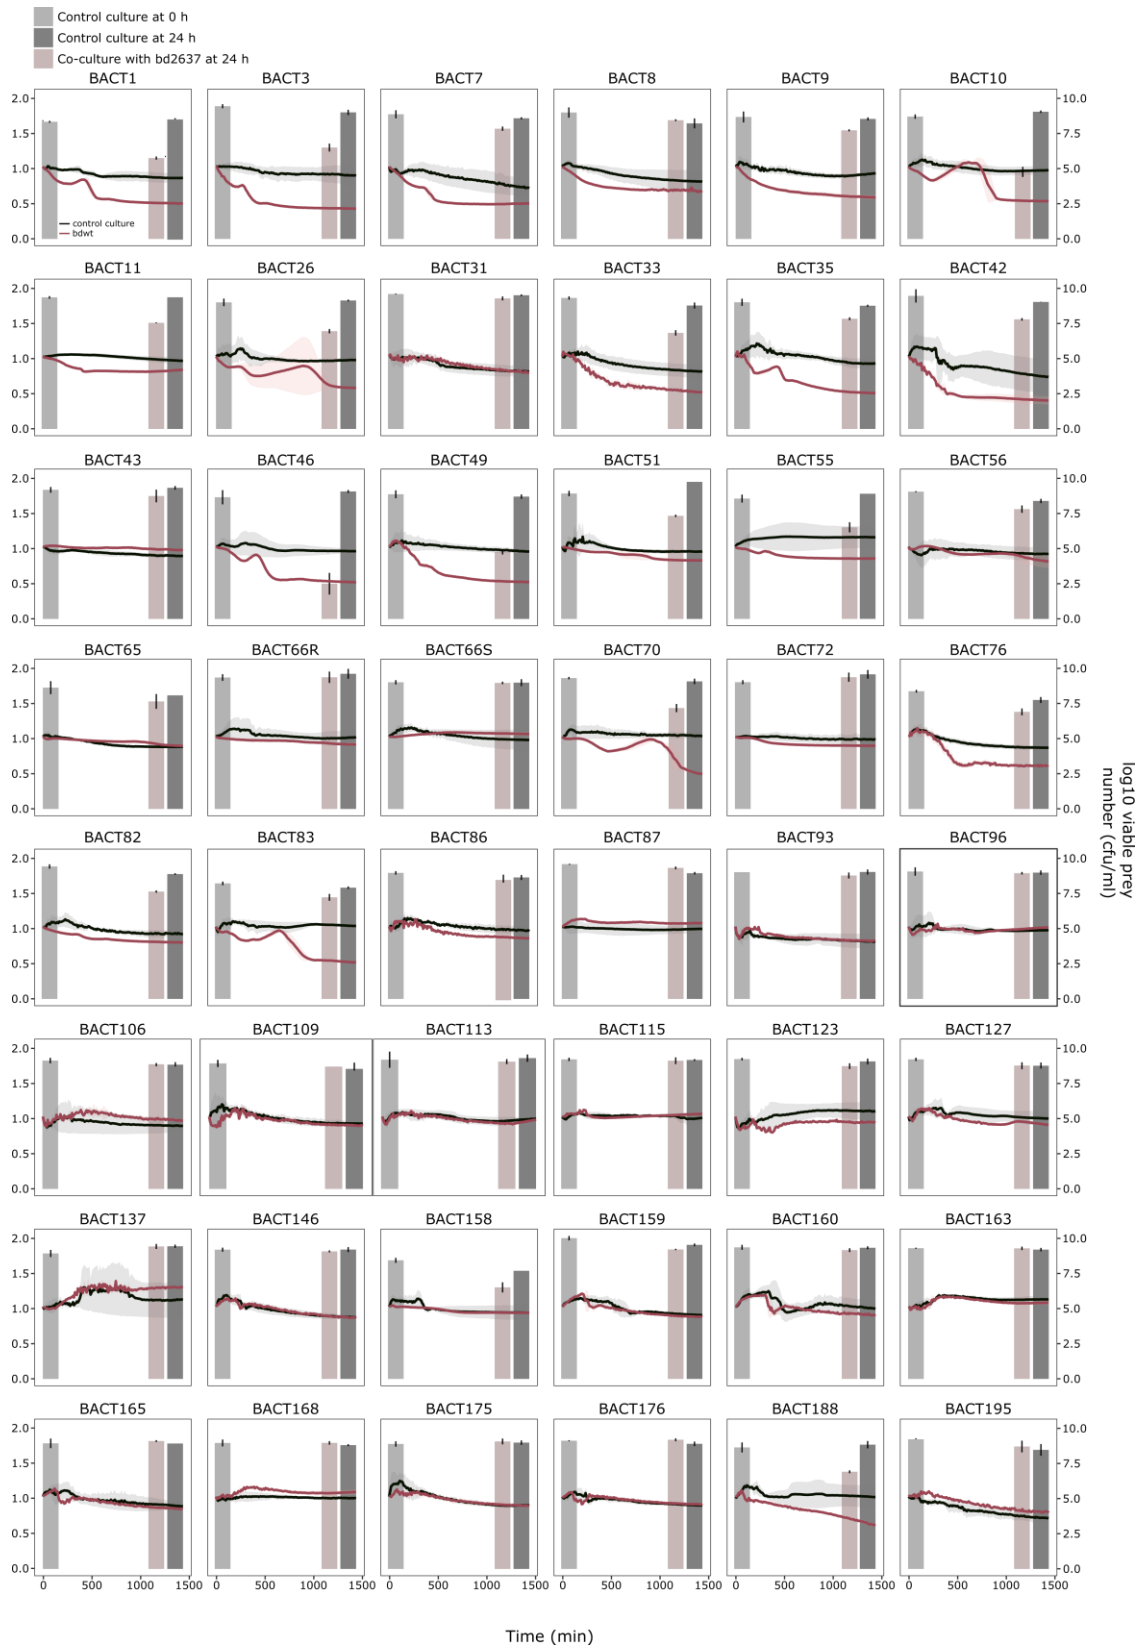

521

522

523

**Fig S6. Predation susceptibility of BSI-PA prey collection by bd2637 derivative.** OD<sub>600</sub> was measured every 10 min and lines represent the mean of 3 biological replicates, and the shaded

524 area indicates standard error of the mean. Bars represent the means of 3 independent viable  
525 prey quantification and error bars represent the standard error of the mean.  
526

527

528 **Table S1. Predation susceptibility analysis of the prey clinical isolates used as prey.**

529

530 **Table S2. Antibiotic resistance profile of the clinical isolates used as prey.**

531

532 **Table S3. Kinetic parameters of predation experiments with *B. bacteriovorus* 109J and**  
533 **Bd2637 mutant strain**

534

535 **Table S4. Chromosomal mutations accumulated during gene deletion.**

| Gene       | Gene Product            | Type      | Position <sup>1</sup> | Reference <sup>2</sup> | Alternative | Effect |
|------------|-------------------------|-----------|-----------------------|------------------------|-------------|--------|
| Bd2637     | Scl-PHA<br>depolymerase | Insertion | 1.948.957             | G                      | GAT         | --     |
| Intergenic | -                       | Deletion  | 1.043.270             | ACTTCTT                | A           | -      |

536 <sup>1</sup>Position relative to the chromosomal coordinate. <sup>2</sup>Reference genome is *B. bacteriovorus* 109J

537 (deposited in Sequence Read Archive [SRA], BioProject ID: PRJNA723206). Scl-PHA: short-

538 chain length polyhydroxyalkanoate.

539
